# Supplementary material for: Survival strategies of aerobic methanotrophs under hypoxia in methanogenic lake sediments
Source: Research Square preprint supplement (doi:10.21203/rs.3.rs-3790875/v1), 2024-04-18
Supplement: Supplementary file 1 [file 322276517c73a3490654b24c.xlsx]

## Sheet: גיליון2
	Table 1: Genome assembly statistics.
	Originally enriched in experiment	MAG	Genome Name	Size (mba)	Contigs N50 (mba)	CheckM Completeness (%)	CheckM Contamination (%)	Relative abundance (%)	Closest ANIb		ANIb (%)
	DNA-SIP	LK_1	Methylobacter	3.96281	0.09598	99.16	1.63	40.6	Methylobacter tundripaludum strain OWC-G53F (GCA_002934365.1)		84
		LK_2	Methylogaea	3.89647	0.030414	98.2	4.95	2.10191	Methylogaea oryzae strain E10 (GCA_019669985.1)		81		`
		LK_3	Methylomonas	4.15282	0.076581	99.25	0.46	6.89778	Methylomonas sp. ZR1 (GCA_013141865.1)		76
	Hypoxic	LK_4	Methylomonas	4.04229	0.277551	99.94	0.17	35.1225	Methylomonas sp. strain FW.007 (GCA_002928965.1)		84
		LK_5	Methylomonas	4.76073	0.083535	99.94	0.69	6.54942			84
	amb - million base pairs, bANI - Average nucleotide identity
