# Supplementary material for: Survival strategies of aerobic methanotrophs under hypoxia in methanogenic lake sediments
Source: Research Square preprint supplement (doi:10.21203/rs.3.rs-3790875/v1), 2024-04-18
Supplement: Supplementary file 3 [file beae00ec302ee8cb25fab91c.xlsx]

## Sheet: גיליון1
Table 2 List of presence/ absence functions
		Methylobacter LK_1	Methylomonas LK_2	Methylogaea LK_3	Methylomonas LK_4	Methylomonas LK_5
	Originally enriched in exp	A			B
C1	pmoCAB operon	+	+	-	+	+
	pmoABC operon	-	-	+	+	+
	mxaF	-	+	-	+	+
	xoxF	+	+	-	+	+
	RuMP	+	+	+	+	+
	ED	+	+	-	+	+
	EMP	+	+	+	+	+
	Serine cycle	-	-	-	-	-
	TCA	+	+	-	+	+
Detailed description of all predicted proteins used to construct this table are listed in Table S6
